# Supplementary material for: Analysis of the Structure-Function-Dynamics Relationships of GALT Enzyme and of Its Pathogenic Mutant p.Q188R: A Molecular Dynamics Simulation Study in Different Experimental Conditions
Source: MDPI journal article supplement (doi:10.3390/molecules26195941), 2021-09-30
Supplement: s1 [file s1]

# Supplementary File 1

## Quality check for wtGALT at 310K

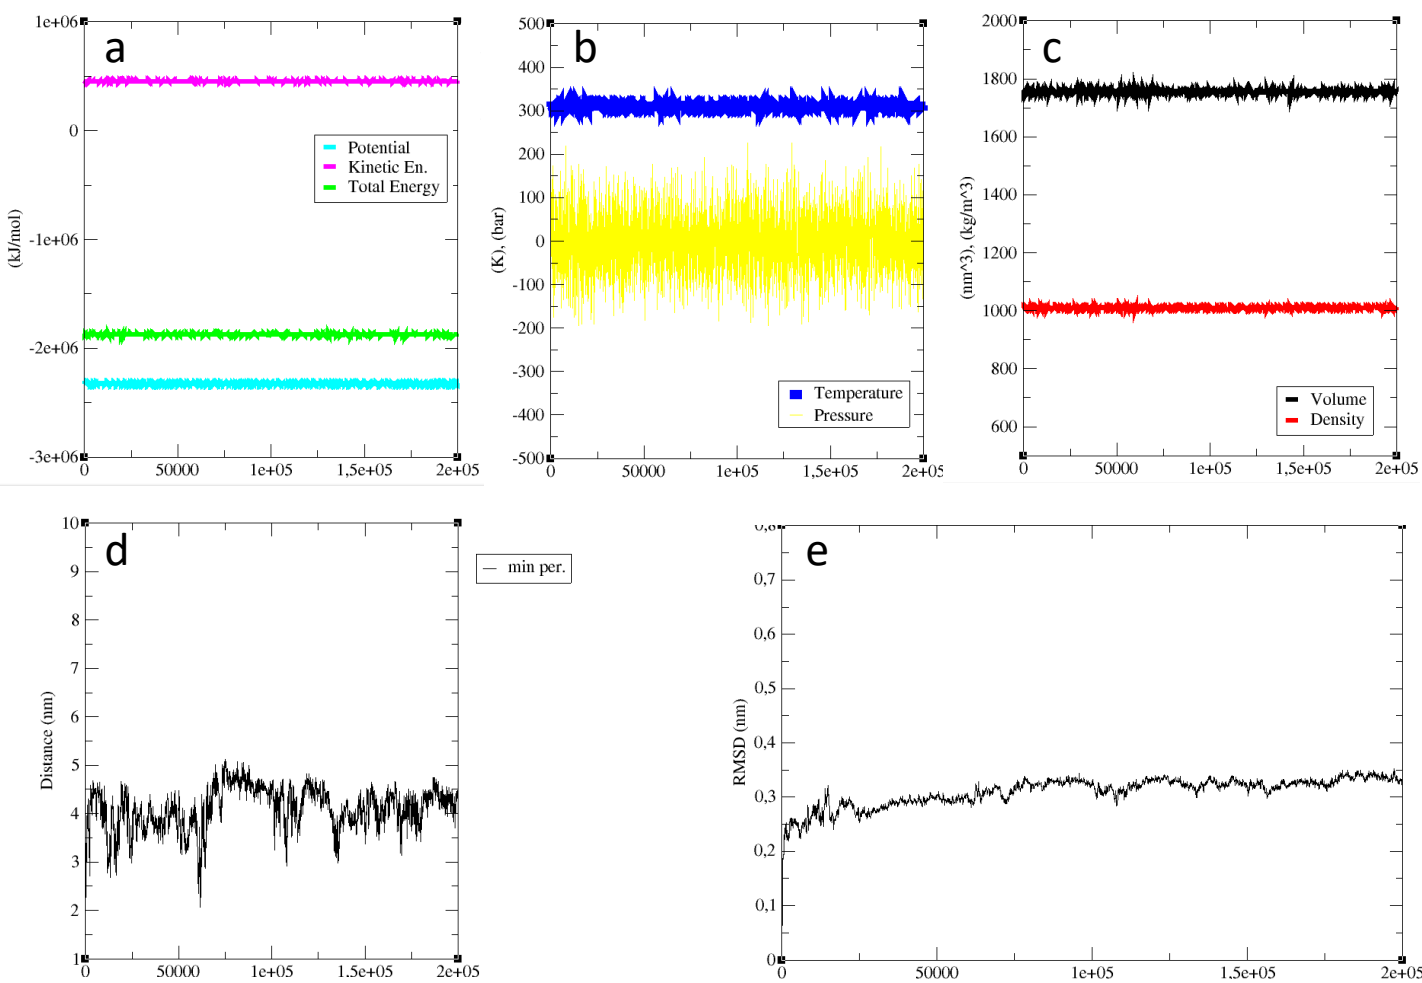

Legend: a: evolution of potential, kinetic and total energy; b: evolution of temperature and pressure; c: evolution of volume and density; d: variation of minimum distance between periodic images; e: root mean square deviation (RMSD) of atom distances..

# Supplementary File 2

## Quality check for p.Gln188Arg at 310K

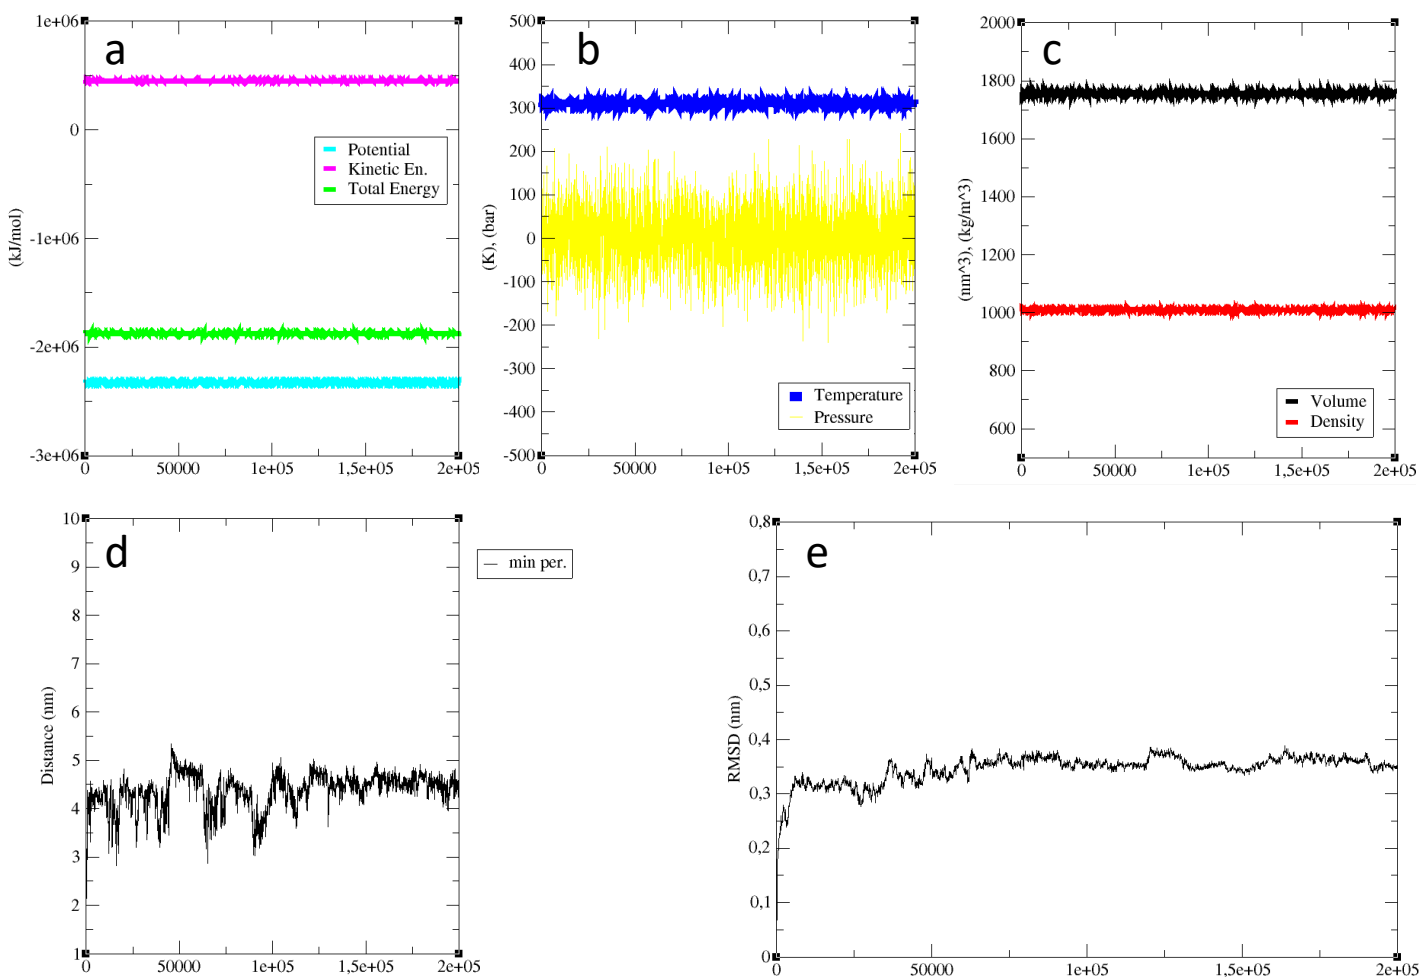

Legend: a: evolution of potential, kinetic and total energy; b: evolution of temperature and pressure; c: evolution of volume and density; d: variation of minimum distance between periodic images; e: root mean square deviation (RMSD) of atom distances.

# Supplementary File 3

## Quality check for wtGALT + ligands at 310K

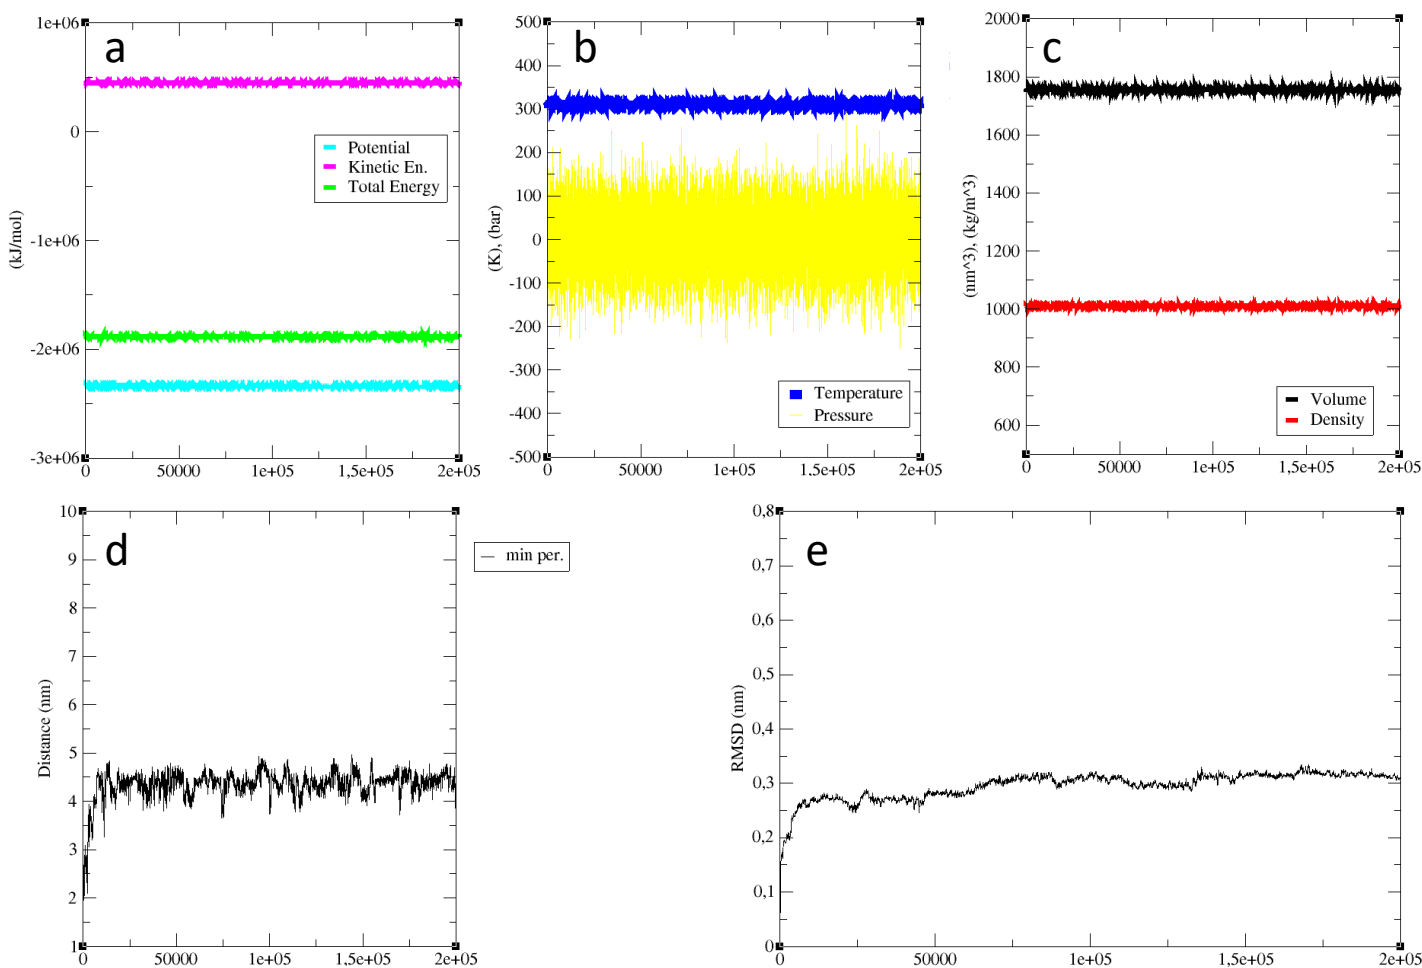

Legend: a: evolution of potential, kinetic and total energy; b: evolution of temperature and pressure; c: evolution of volume and density; d: variation of minimum distance between periodic images; e: root mean square deviation (RMSD) of atom distances.

# Supplementary File 4

## Quality check for p.Gln188Arg + ligands at 310K

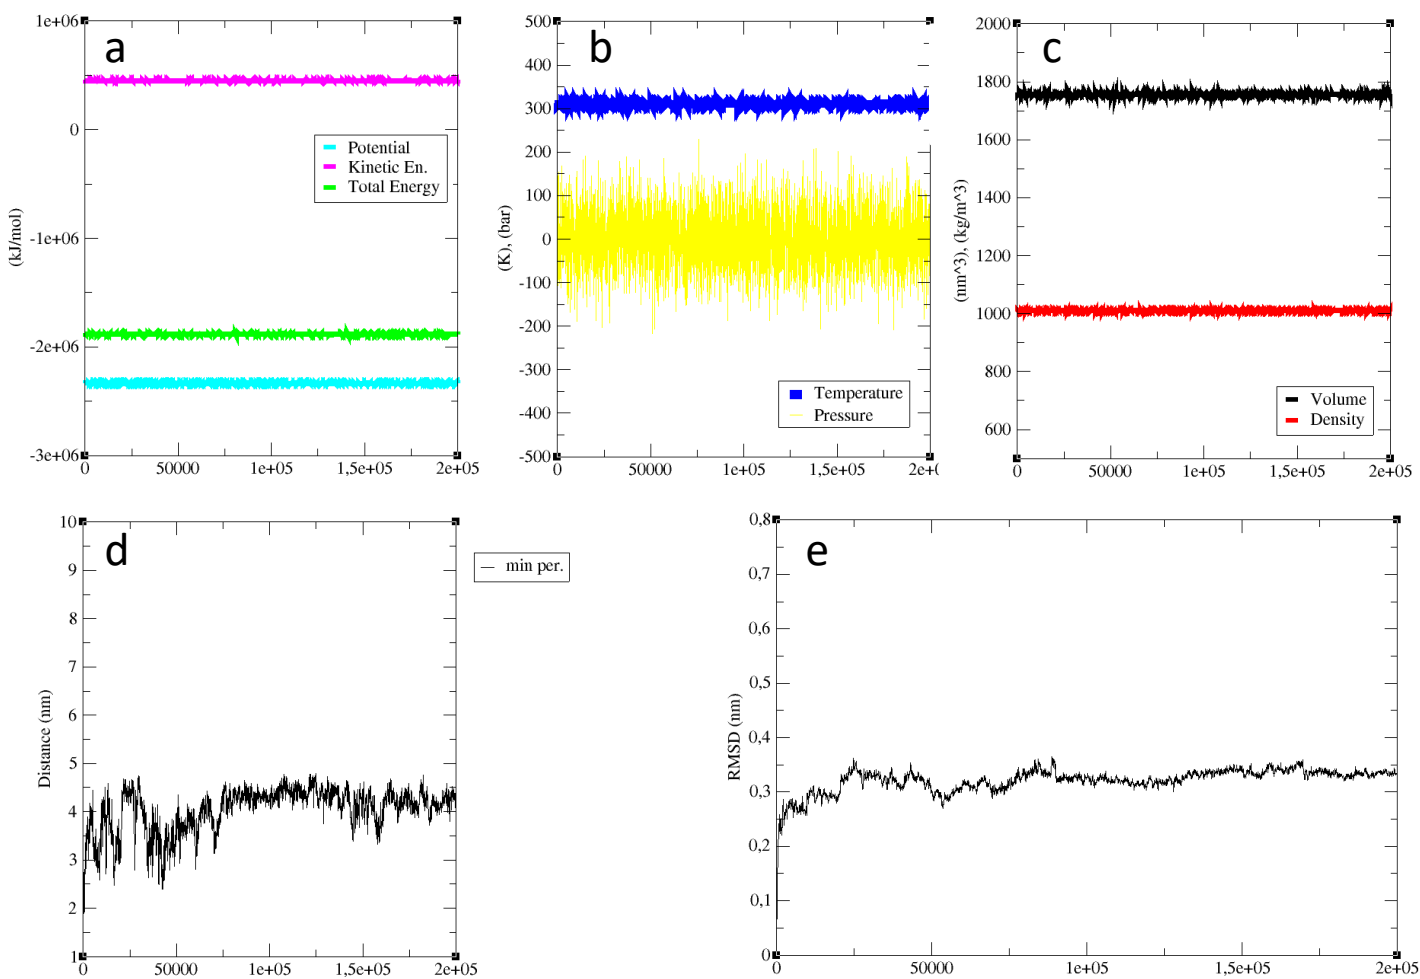

Legend: a: evolution of potential, kinetic and total energy; b: evolution of temperature and pressure; c: evolution of volume and density; d: variation of minimum distance between periodic images; e: root mean square deviation (RMSD) of atom distances.

# Supplementary File 5

## Quality check for wtGALT at 334K

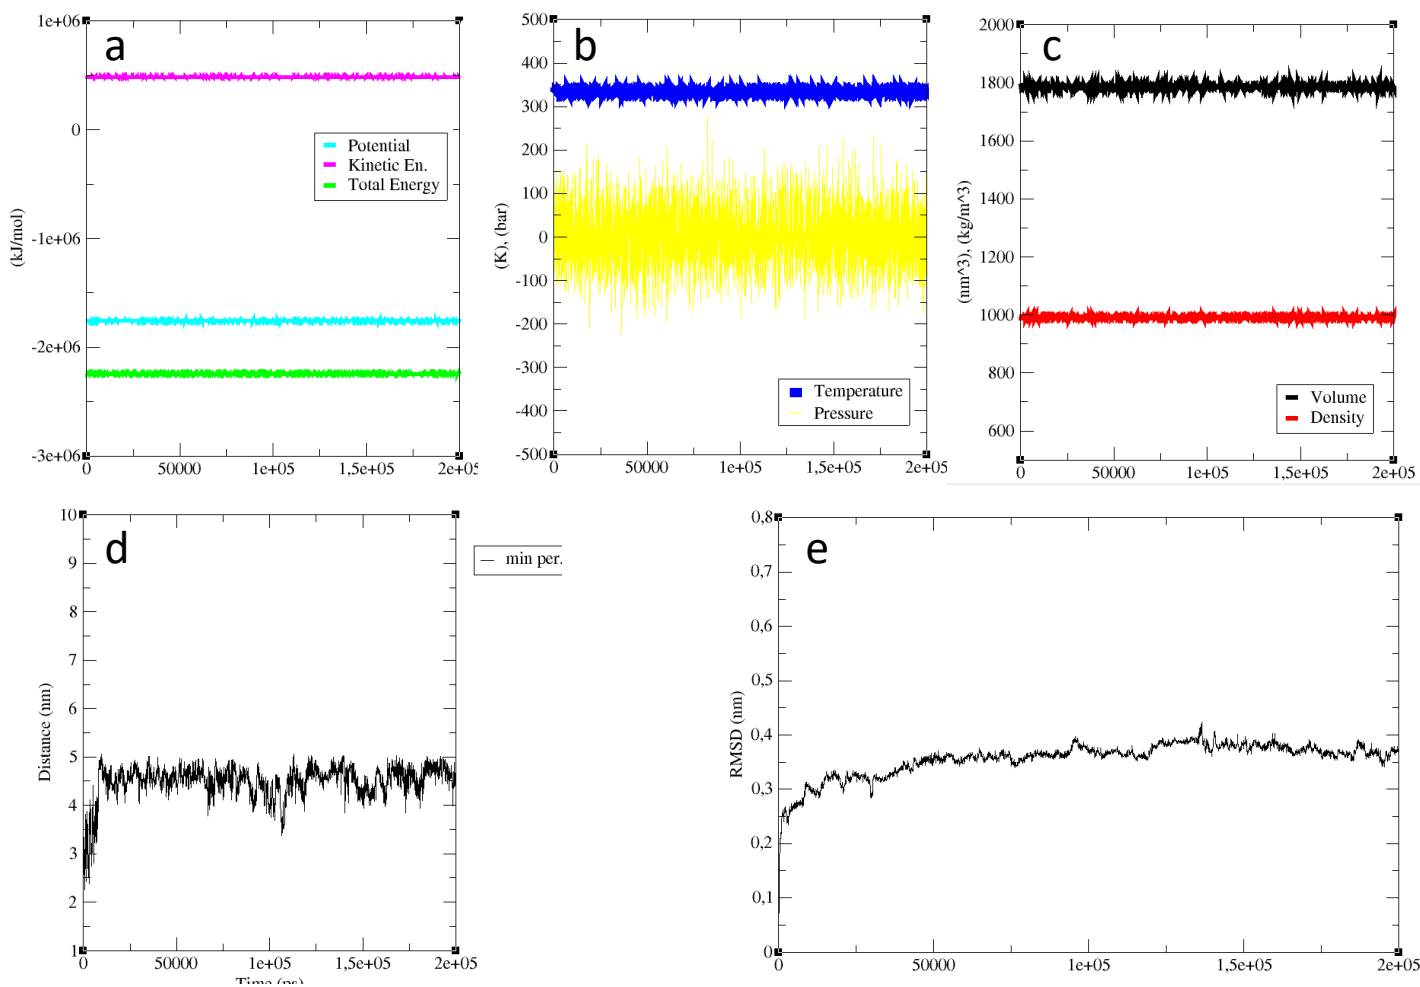

Legend: a: evolution of potential, kinetic and total energy; b: evolution of temperature and pressure; c: evolution of volume and density; d: variation of minimum distance between periodic images; e: root mean square deviation (RMSD) of atom distances.

# Supplementary File 6

## Quality check for p.Gln188Arg at 334K

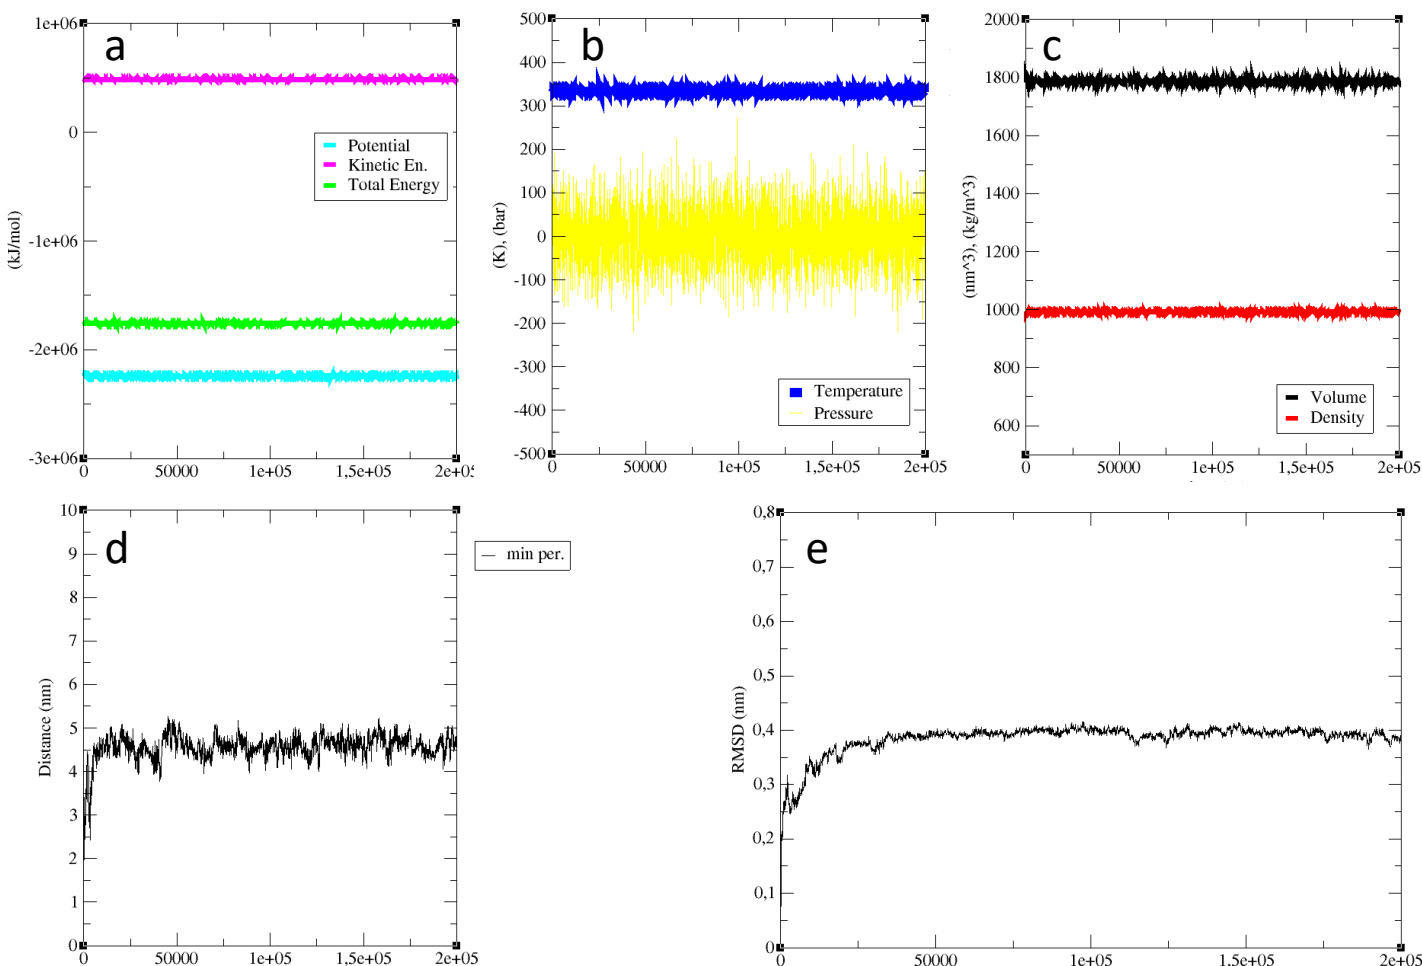

Legend: a: evolution of potential, kinetic and total energy; b: evolution of temperature and pressure; c: evolution of volume and density; d: variation of minimum distance between periodic images; e: root mean square deviation (RMSD) of atom distances.

# Supplementary File 7

## Quality check for wtGALT + ligands at 334K

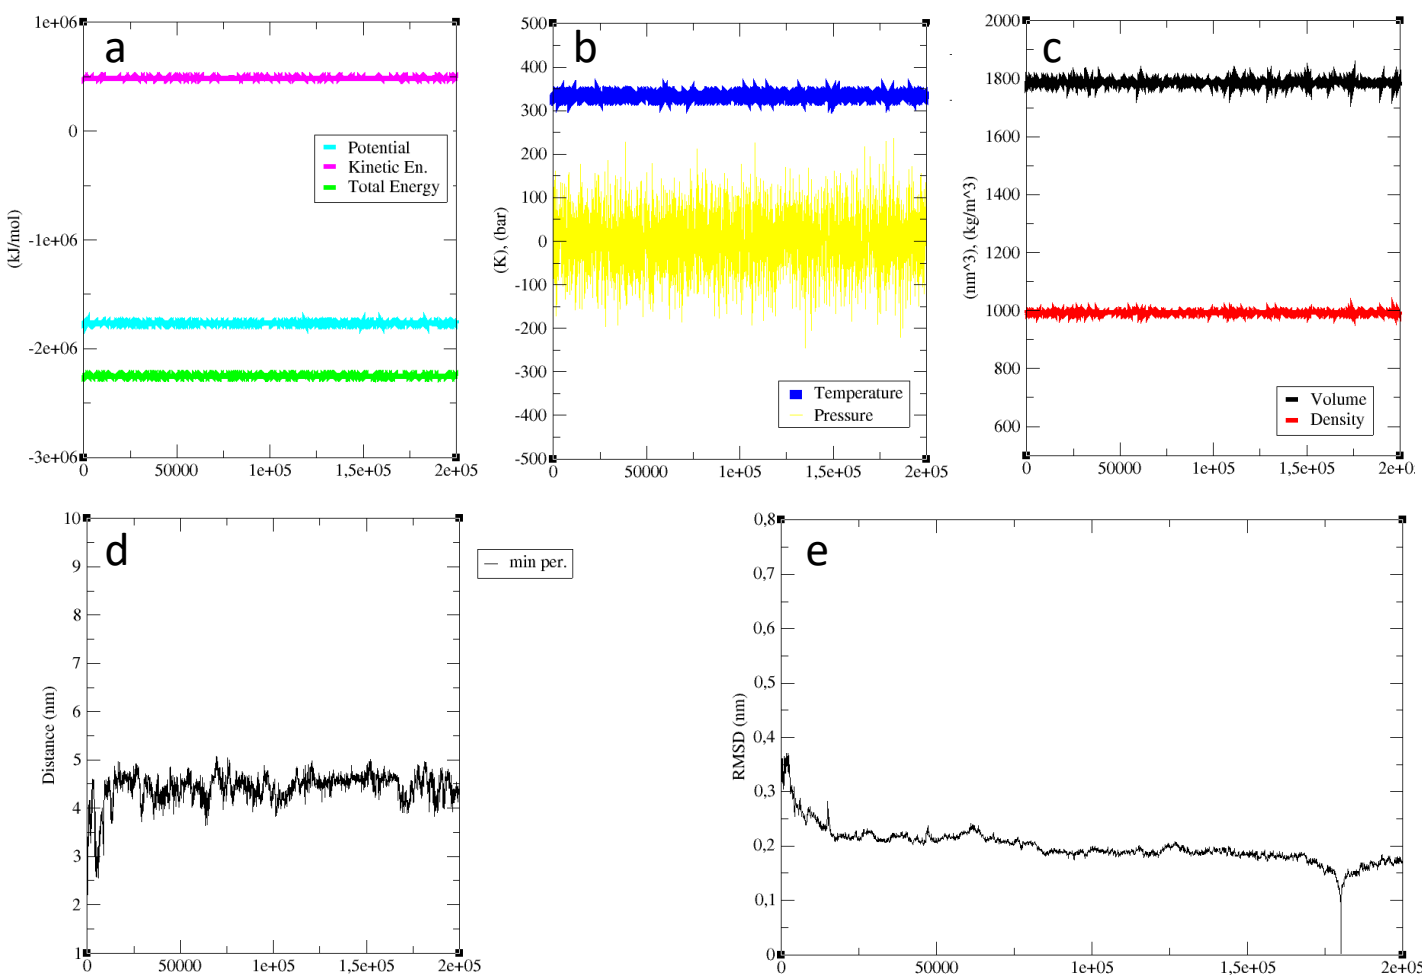

Legend: a: evolution of potential, kinetic and total energy; b: evolution of temperature and pressure; c: evolution of volume and density; d: variation of minimum distance between periodic images; e: root mean square deviation (RMSD) of atom distances.

# Supplementary File 8

## Quality check for p.Gln188Arg + ligands at 334K

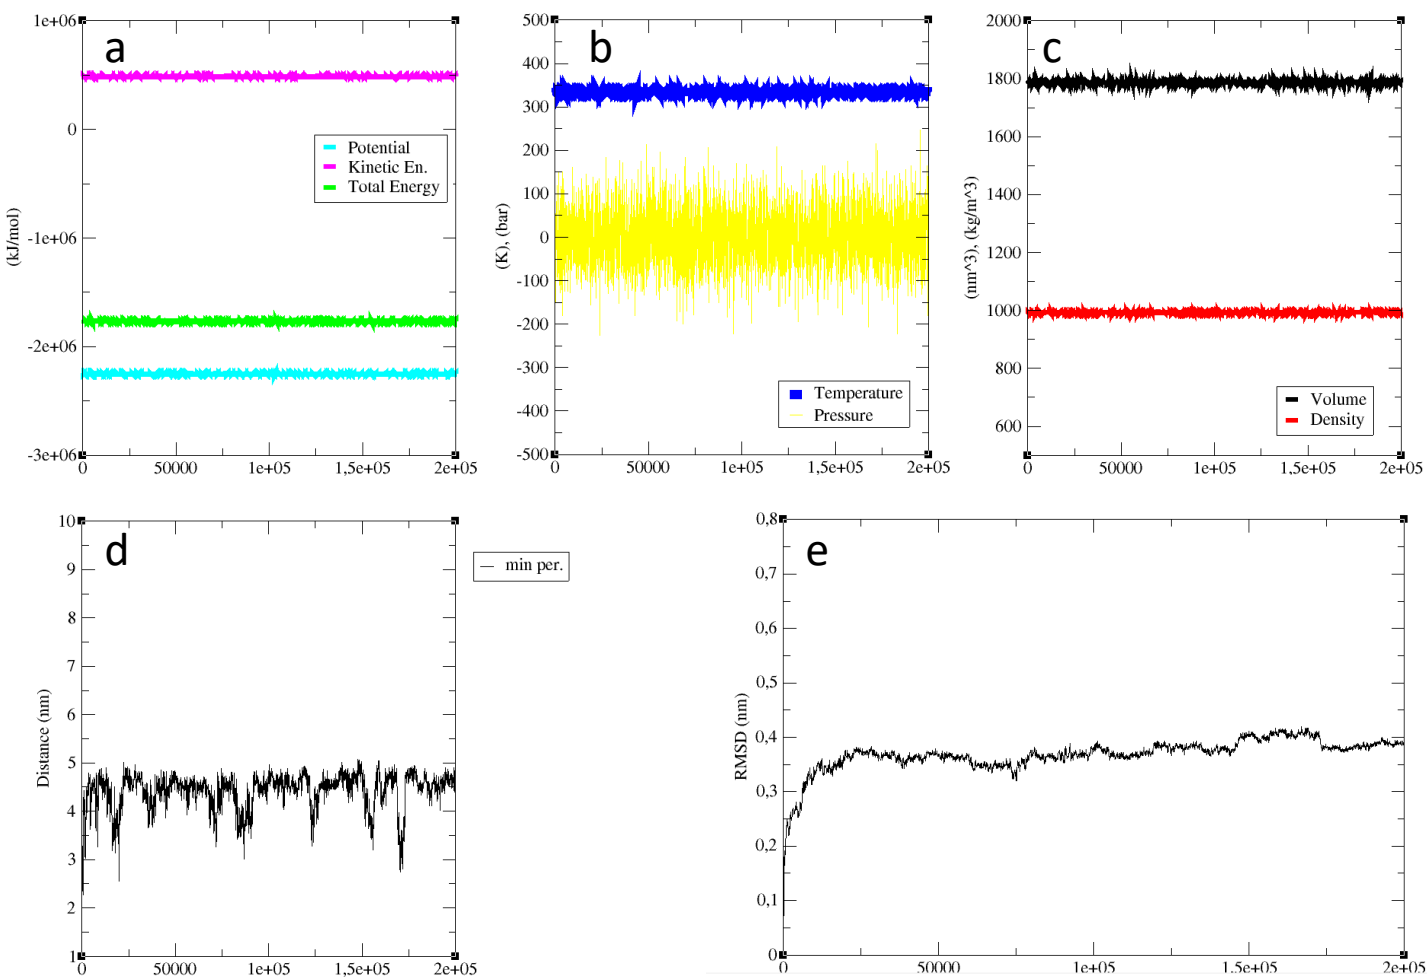

Legend: a: evolution of potential, kinetic and total energy; b: evolution of temperature and pressure; c: evolution of volume and density; d: variation of minimum distance between periodic images; e: root mean square deviation (RMSD) of atom distances.
